# Supplementary material
Source: PubMed Central journal article supplement (PMC8898261)
Supplement: NIHMS1767244-supplement-2.pdf [file NIHMS1767244-supplement-2.pdf]

**Table S1. ASOs used in this study**

| ASO name          | Length | Sequence 5'-3'     | Chemistry                      |
|-------------------|--------|--------------------|--------------------------------|
| ASO1-cEt/DNA      | 18 nt  | AGGCGGCGGAGTTCCTCA | kkddkddkddkddkddkk             |
| ASO2-cEt/DNA      | 16 nt  | GAGGACGATTATGGCC   | kkddkddkddkddkddkk             |
| Ctrl-cEt/DNA      | 18 nt  | CGGATGAGTGCCTGCAAT | kkddkddkddkddkddkk             |
| mASO3-cEt/DNA     | 16 nt  | ACTTGGTGAGCACGAT   | kddkddkddkddkddk               |
| mASO3-GN3-cEt/DNA | 16 nt  | ACTTGGTGAGCACGAT   | 5'GalNAc3-<br>kddkddkddkddkddk |

Base modification: k = constrained ethyl (cEt) base modification; d = DNA base; ligand conjugation: GalNAc3 = triantennary *N*-acetylgalactosamine; all ASOs have uniform P=S backbone and 5-methyl-C modifications
